# Supplementary material
Source: ML conference proceedings conference paper supplement (https://proceedings.mlr.press/v119/zhang20p.html)
Supplement: Supplementary file [file zhang20p-supp.pdf]

## A. Proof of Lemmas in Preliminaries

### A.1. Proof of Lemma 3

*Proof.* Let  $g(t) = f(x + t(y - x))$  for  $t \in [0, 1]$ , then  $g$  is  $L\|y - x\|$ -Lipschitz implying that  $g$  is absolutely continuous. Thus from the fundamental theorem of calculus (Lebesgue),  $g$  has a derivative  $g'$  almost everywhere, and the derivative is Lebesgue integrable such that

$$g(t) = g(0) + \int_0^t g'(s) ds.$$

Moreover, if  $g$  is differentiable at  $t$ , then

$$g'(t) = \lim_{\delta t \rightarrow 0} \frac{g(t + \delta t) - g(t)}{\delta t} = \lim_{\delta t \rightarrow 0} \frac{f(x + (t + \delta t)(y - x)) - f(x + t(y - x))}{\delta t} = f'(x + t(y - x), y - x).$$

Since this equality holds almost everywhere, we have

$$f(y) - f(x) = g(1) - g(0) = \int_0^1 g'(t) dt = \int_0^1 f'(x + t(y - x), y - x) dt.$$

□

### A.2. Proof of Lemma 4

*Proof.* For any  $\varphi(t) = x + td$  as given in Definition 3, let  $t_k \rightarrow 0$ . Denote  $x_k = \varphi(t_k)$ ,  $\delta_k = \|x_k - x\| \rightarrow 0$ . By Proposition 1.6, we know that there exists  $g_{k,j} \in \cup_{y \in x + \delta_k B} \partial f(y)$  such that

$$f(x_k) - f(x) = \langle g_{k,j}, x_k - x \rangle.$$

By the existence of directional derivative, we know that

$$\lim_{k \rightarrow \infty} \langle g_{k,j}, d \rangle = \lim_{k \rightarrow \infty} \frac{\langle g_{k,j}, t_k d \rangle}{t_k} = f'(x, d)$$

$g_{k,j}$  is in a bounded set with norm less than  $L$ . The Lemma follows by the fact that any accumulation point of  $g_{k,j}$  is in  $\partial f(x)$  due to upper-semicontinuity of  $\partial f(x)$ . □

## B. Proof of Lemmas in Algorithm Complexity

### B.1. Proof of Theorem 5

Our proof strategy is similar to Theorem 1.1.2 in (Nesterov, 2018), where we use the resisting strategy to prove lower bound. Given a one dimensional function  $f$ , let  $x_k, k \in [1, K]$  be the sequence of points queried in ascending order instead of query order. We assume without loss of generality that the initial point is queried and is an element of  $\{x_k\}_{k=0}^K$  (otherwise, query the initial point first before proceeding with the algorithm).

Then we define the resisting strategy: always return

$$f(x) = 0, \text{ and } \nabla f(x) = L.$$

If we can prove that for any set of points  $x_k, k \in [1, K]$ , there exists two functions such that they satisfy the resisting strategy  $f(x_k) = 0$ , and  $\nabla f(x_k) = L, k \in [1, K]$ , and that the two functions do not share any common stationary points, then we know no randomized/deterministic can return an  $\epsilon$ -stationary points with probability more than  $1/2$  for both functions simultaneously. In other word, no algorithm that query  $K$  points can distinguish these two functions. Hence we proved the theorem following the definition of complexity in (5) with  $\delta = 0$ .

All we need to do is to show that such two functions exist in the Lemma below.

**Lemma 12.** *Given a finite sequence of real numbers  $\{x_k\}_{k \in [1, K]} \in \mathbb{R}$ , there is a family of functions  $f_\theta \in \mathcal{F}(\Delta, L)$  such that for any  $k \in [1, K]$ ,*

$$f_\theta(x_k) = 0 \quad \text{and} \quad \nabla f_\theta(x_k) = L$$

*and for  $\epsilon$  sufficiently small, the set of  $\epsilon$ -stationary points of  $f_\theta$  are all disjoint, i.e  $\{\epsilon\text{-stationary points of } f_{\theta_1}\} \cap \{\epsilon\text{-stationary points of } f_{\theta_2}\} = \emptyset$  for any  $\theta_1 \neq \theta_2$ .*

*Proof.* Up to a permutation of the indices, we could reorder the sequence in the increasing order. WLOG, we assume  $x_k$  is increasing. Let  $\delta = \min\{\min_{x_i \neq x_j} \{|x_i - x_j|\}, \frac{\Delta}{L}\}$ . For any  $0 < \theta < 1/2$ , we define  $f_\theta$  by

$$\begin{aligned} f_\theta(x) &= -L(x - x_1 + 2\theta\delta) \quad \text{for } x \in (-\infty, x_1 - \theta\delta] \\ f_\theta(x) &= L(x - x_k) \quad \text{for } x \in \left[x_k - \theta\delta, \frac{x_k + x_{k+1}}{2} - \theta\delta\right] \\ f_\theta(x) &= -L(x - x_{k+1} + 2\theta\delta) \quad \text{for } x \in \left[\frac{x_k + x_{k+1}}{2} - \theta\delta, x_{k+1} - \theta\delta\right] \\ f_\theta(x) &= L(x - x_K) \quad x \in [x_K + \theta\delta, +\infty). \end{aligned}$$

It is clear that  $f_\theta$  is directional differentiable at all point and  $\nabla f_\theta(x_k) = L$ . Moreover, the minimum  $f_\theta^* = -L\theta\delta \geq -\Delta$ . This implies that  $f_\theta \in \mathcal{F}(\Delta, L)$ . Note that  $\nabla f_\theta = L$  or  $-L$  except at the local extremum. Therefore, for any  $\epsilon < L$  the set of  $\epsilon$ -stationary points of  $f_\theta$  are exactly

$$\{\epsilon\text{-stationary points of } f_\theta\} = \{x_k - \theta\delta \mid k \in [1, K]\} \cup \left\{ \frac{x_k + x_{k+1}}{2} - \theta\delta \mid k \in [1, K-1] \right\},$$

which is clearly distinct for different choice of  $\theta$ . □

### B.2. Proof of Proposition 6

*Proof.* When  $x$  is  $(\frac{\epsilon}{3L}, \frac{\epsilon}{3})$  stationary, we have  $d(0, \partial f(x + \frac{\epsilon}{3L}B)) \leq \frac{\epsilon}{3}$ . By definition, we could find  $g \in \text{conv}(\cup_{y \in x + \frac{\epsilon}{3L}B} \nabla f(y))$  such that  $\|g\| \leq 2\epsilon/3$ . This means, there exists  $x_1, \dots, x_k \in x + \frac{\epsilon}{3L}B$ , and  $\alpha_1, \dots, \alpha_k \in [0, 1]$  such that  $\alpha_1 + \dots + \alpha_k = 1$  and

$$g = \sum_{i=1}^k \alpha_i \nabla f(x_i)$$

Therefore

$$\begin{aligned} \|\nabla f(x)\| &\leq \|g\| + \|\nabla f(x) - g\| \\ &\leq \frac{2\epsilon}{3} + \sum_{i=1}^k \alpha_i \|\nabla f(x) - \nabla f(x_k)\| \\ &\leq \frac{2\epsilon}{3} + \sum_{i=1}^k \alpha_i L \|x - x_k\| \\ &\leq \frac{2\epsilon}{3} + \sum_{i=1}^k \alpha_i L \frac{\epsilon}{3L} = \epsilon. \end{aligned}$$

Therefore,  $x$  is an  $\epsilon$ -stationary point in the standard sense. □

### B.3. Proof of Lemma 7

*Proof.* First, we show that the limit exists. By Lipschitzness and Jenson inequality, we know that  $\partial f(x + \delta_{k+1}B)$  lies in a bounded ball with radius  $L$ . For any sequence of  $\{\delta_k\}$  with  $\delta_k \downarrow 0$ , we know that  $\partial f(x + \delta_{k+1}B) \subseteq \partial f(x + \delta_k B)$ . Therefore, the limit exists by the monotone convergence theorem.

Next, we show that  $\lim_{\delta \downarrow 0} \partial f(x + \delta B) = \partial f(x)$ . For one direction, we show that  $\partial f(x) \subseteq \lim_{\delta \downarrow 0} \partial f(x + \delta B)$ . This follows by proposition 1.5 and the fact that

$$\cup_{y \in x + \delta B} \partial f(y) \subseteq \text{conv}(\cup_{y \in x + \delta B} \partial f(y)) = \partial f(x + \delta B).$$

Next, we show the other direction  $\lim_{\delta \downarrow 0} \partial f(x + \delta B) \subseteq \partial f(x)$ . By upper semicontinuity, we know that for any  $\epsilon > 0$ , there exists  $\delta > 0$  such that

$$\cup_{y \in x + \delta B} \partial f(y) \subseteq \partial f(x) + \epsilon B.$$

Then by convexity of  $\partial f(x)$  and  $\epsilon B$ , we know that their Minkowski sum  $\partial f(x) + \epsilon B$  is convex. Therefore, we conclude that for any  $\epsilon > 0$ , there exists  $\delta > 0$  such that

$$\partial f(x + \delta B) = \text{conv}(\cup_{y \in x + \delta B} \partial f(y)) \subseteq \partial f(x) + \epsilon B.$$

□

### C. Proof of Theorem 8

Before we prove the theorem, we first analyze how many times the algorithm iterates in the while loop.

**Lemma 13.** Let  $K = \frac{48L^2}{\epsilon^2}$ . Given  $t \in [1, T]$ ,

$$\mathbb{E}[\|m_{t,K}\|^2] \leq \frac{\epsilon^2}{16}.$$

where for convenience of analysis, we define  $m_{t,k} = 0$  for all  $k > k_0$  if the  $k$ -loop breaks at  $(t, k_0)$ . Consequently, for any  $\gamma < 1$ , with probability  $1 - \gamma$ , there are at most  $\log(1/\gamma)$  restarts of the while loop at the  $t$ -th iteration.

*Proof.* Let  $\mathfrak{F}_{t,k} = \sigma(y_{t,1}, \dots, y_{t,k+1})$ , then  $x_{t,k}, m_{t,k} \in \mathfrak{F}_{t,k}$ . We denote  $D_{t,k}$  as the event that  $k$ -loop does not break at  $x_{t,k}$ , i.e.  $\|m_{t,k}\| > \epsilon$  and  $f(x_{t,k}) - f(x_t) > -\frac{\delta\|m_{t,k}\|}{4}$ . It is clear that  $D_{t,k} \in \mathfrak{F}_{t,k}$ .

Let  $\gamma(\lambda) = (1 - \lambda)x_t + \lambda x_{t,k}$ ,  $\lambda \in [0, 1]$ . Note that  $\gamma'(\lambda) = x_{t,k} - x_t = -\delta \frac{m_{t,k}}{\|m_{t,k}\|}$ . Since  $y_{t,k+1}$  is uniformly sampled from line segment  $[x_t, x_{t,k}]$ , we know

$$\mathbb{E}[\langle g_{t,k+1}, x_{t,k} - x_t \rangle | \mathfrak{F}_{t,k}] = \int_0^1 f'(\gamma(t), x_{t,k} - x_t) dt = f(x_{t,k}) - f(x_t)$$

where the second equality comes from directional differentiability. Since  $x_{k+1} - x_k = -\delta \frac{m_{t,k}}{\|m_{t,k}\|}$ , we know that

$$\mathbb{E}[\langle g_{t,k+1}, m_{t,k} \rangle | \mathfrak{F}_{t,k}] = -\frac{\|m_{t,k}\|}{\delta} (f(x_{t,k}) - f(x_t)). \quad (7)$$

By construction  $m_{t,k+1} = \beta m_{t,k} + (1 - \beta)g_{t,k+1}$  under  $D_{t,k} \cap \dots \cap D_{t,1}$ , and  $m_{t,k+1} = 0$  otherwise. Therefore,

$$\begin{aligned} & \mathbb{E}[\|m_{t,k+1}\|^2 | \mathfrak{F}_{t,k}] \\ &= \mathbb{E}[\|\beta m_{t,k} + (1 - \beta)g_{t,k+1}\|^2 \mathbb{1}_{D_{t,k} \cap \dots \cap D_{t,1}} | \mathfrak{F}_{t,k}] \\ &\leq (\beta^2 \|m_{t,k}\|^2 + (1 - \beta)^2 L^2 + 2\beta(1 - \beta) \mathbb{E}[\langle g_{t,k+1}, m_{t,k} \rangle | \mathfrak{F}_{t,k}]) \mathbb{1}_{D_{t,k} \cap \dots \cap D_{t,1}} \\ &\leq \beta^2 \|m_{t,k}\|^2 + (1 - \beta)^2 L^2 - 2\beta(1 - \beta) \frac{\|m_{t,k}\|}{\delta} (f(x_{t,k}) - f(x_t)) \mathbb{1}_{D_{t,k} \cap \dots \cap D_{t,1}} \\ &\leq \beta^2 \|m_{t,k}\|^2 + (1 - \beta)^2 L^2 + 2\beta(1 - \beta) \frac{\|m_{t,k}\|^2}{4} \end{aligned}$$

where in the third line, we use the fact  $\beta, D_{t,k} \cap \dots \cap D_{t,1} \in \mathfrak{F}_{t,k}$ ; in the fourth line we use the fact under  $D_{t,k}$ ,  $f(x_{t,k}) - f(x_t) \geq -\frac{\delta\|m_{t,k}\|}{4}$ . The last equation is a quadratic function with respect to  $\beta$ , which could be rewritten as

$$h(\beta) = \beta^2 \left( \frac{\|m_{t,k}\|^2}{2} + L^2 \right) - 2\beta \left( L^2 - \frac{\|m_{t,k}\|^2}{4} \right) + L^2.$$

It achieves the minimum at  $\beta = \frac{4L^2 - \|m_{t,k}\|^2}{4L^2 + 2\|m_{t,k}\|^2}$ , which belongs to  $\mathfrak{F}_{t,k}$ . Since  $\|m_{t,k}\| \leq L$ , we have

$$h^* = \frac{L^2}{L^2 + \frac{\|m_{t,k}\|^2}{2}} \|m_{t,k}\|^2 \leq \left( 1 - \frac{\|m_{t,k}\|^2}{3L^2} \right) \|m_{t,k}\|^2$$

Therefore,

$$\begin{aligned}
 & \mathbb{E}[\|m_{t,k+1}\|^2] \\
 &= \mathbb{E}[\mathbb{E}[\|m_{t,k+1}\|^2 | \mathfrak{F}_{t,k}]] \\
 &\leq \mathbb{E}\left[\left(1 - \frac{\|m_{t,k}\|^2}{3L^2}\right) \|m_{t,k}\|^2\right] \\
 &\leq \left(1 - \frac{\mathbb{E}[\|m_{t,k}\|^2]}{3L^2}\right) \mathbb{E}[\|m_{t,k}\|^2]
 \end{aligned}$$

where the last inequality follows from Jensen's inequality under the fact that the function  $x \rightarrow (1 - x/3L^2)x$  is concave. Now consider the sequence  $v_k = \mathbb{E}[\|m_{t,k}\|^2]/L^2 \in [0, 1]$ , we get

$$v_{k+1} \leq v_k - v_k^2/3 \implies \frac{1}{v_{k+1}} \geq \frac{1}{v_k - v_k^2/3} \geq \frac{1}{v_k} + \frac{1}{3}.$$

Knowing that  $v_1 \leq 1$ , we therefore have

$$v_k \leq \frac{3}{k+2}.$$

When  $K > \frac{48L^2}{\epsilon^2}$ , we have  $\mathbb{E}[\|m_{t,K}\|^2] \leq \frac{\epsilon^2}{16}$ . Therefore, by Markov inequality,  $\mathcal{P}\{\|m_{t,K}\| \geq \epsilon\} \leq 1/4$ . In other word, the while-loop restart with probability at most  $1/4$ . Therefore, with probability  $1 - \gamma$ , there are at most  $\log(1/\gamma)$  restarts.  $\square$

Now we are ready to prove the main theorem.

*Proof of Theorem 8.* We notice that  $m_{t,k}$  is always a convex combinations of generalized gradients within the  $\delta$  ball of  $x_k$ , i.e.

$$m_{t,k} \in \partial f(x_t + \delta B) = \text{conv}(\cup_{y \in x_t + \delta B} \partial f(y))$$

Therefore, if at any  $t, k$ ,  $\|m_{t,k}\| \leq \epsilon$ , then the corresponding  $x_t$  is a  $(\delta, \epsilon)$  approximate stationary point. To show that our algorithm always find a  $\|m_{t,k}\| \leq \epsilon$ , we need to control the number of times the descent condition is satisfied, which breaks the while-loop without satisfying  $\|m_{t,k}\| \leq \epsilon$ . Indeed, when the descent condition holds, we have

$$f(x_{t,k}) - f(x_t) \leq -\frac{\delta\|m_{t,k}\|}{4} < -\frac{\delta\epsilon}{4},$$

where we use the fact  $\|m_{t,k}\| > \epsilon$ , otherwise, the algorithm already terminates. Consequently, there are at most  $\frac{4\Delta}{\delta\epsilon} - 1 = T - 1$  iterations that the descent condition holds. As a result, for at least one  $t$ , the while-loop ends providing a  $(\delta, \epsilon)$  approximate stationary point.

By Lemma 13, we know that with probability  $1 - \frac{\gamma\delta\epsilon}{4\Delta}$ , the  $t$ -th iteration terminates in  $\log(\frac{4\Delta}{\gamma\delta\epsilon})$  restarts. Consequently, with probability  $1 - \gamma$ , the algorithm returns a  $(\delta, \epsilon)$  approximate stationary point using

$$\frac{192\Delta L^2}{\epsilon^3\delta} \log\left(\frac{4\Delta}{\gamma\delta\epsilon}\right) \text{ oracle calls.}$$

$\square$

## D. Proof of Theorem 10

Stochastic INGD has convergence guarantee as stated in the next theorem.

**Theorem 14.** *Under the stochastic Assumption 1, the Stochastic INGD algorithm in Algorithm 2 with parameters  $\beta = 1 - \frac{\epsilon^2}{64G^2}$ ,  $p = \frac{64G^2 \ln(16G/\epsilon)}{\delta\epsilon^2}$ ,  $q = 4Gp$ ,  $T = \frac{2^{16}G^3\Delta \ln(16G/\epsilon)}{\epsilon^4\delta} \max\{1, \frac{G\delta}{8\Delta}\}$ ,  $K = p\delta$  has algorithm complexity upper bounded by*

$$\frac{2^{16}G^3\Delta \ln(16G/\epsilon)}{\epsilon^4\delta} \max\{1, \frac{G\delta}{8\Delta}\} = \tilde{O}\left(\frac{G^3\Delta}{\epsilon^4\delta}\right).$$

*Proof.* First, we are going to show that

$$\frac{1}{T} \sum_{t=1}^T \mathbb{E}[\|m_t\|] \leq \epsilon/4. \quad (8)$$

From construction of the descent direction, we have

$$\|m_{t+1}\|^2 = (1 - \beta)^2 \|g(y_{t+1})\|^2 + 2\beta(1 - \beta) \langle g(y_{t+1}), m_t \rangle + \beta^2 \|m_t\|^2. \quad (9)$$

Multiply both side by  $\eta_t$  and sum over  $t$ , we get

$$0 = (1 - \beta)^2 \underbrace{\sum_{t=1}^T \eta_t \|g(y_{t+1})\|^2}_i + 2\beta(1 - \beta) \underbrace{\sum_{t=1}^T \langle g(y_{t+1}), \eta_t m_t \rangle}_{ii} + \underbrace{\sum_{t=1}^T \eta_t (-\|m_{t+1}\|^2 + \beta^2 \|m_t\|^2)}_{iii}. \quad (10)$$

We remark that at each iteration, we have two randomized/stochastic procedure: first we draw  $y_{t+1}$  randomly between the segment  $[x_t, x_{t+1}]$ , second we draw a stochastic gradient at  $y_{t+1}$ . For convenience of analysis, we denote  $\mathcal{G}_t$  as the sigma field generated by  $g(y_t)$ , and  $\mathcal{Y}_t$  as the sigma field generated by  $y_t$ . Clearly,  $\mathcal{G}_t \subset \mathcal{Y}_{t+1} \subset \mathcal{G}_{t+1}$ . By definition  $\eta_t$  is determined by  $m_t$ , which is further determined by  $g_t$ . Hence, the vectors  $m_t, \eta_t$  and  $x_{t+1}$  are  $\mathcal{G}_t$ -measurable.

Now we analyze each term one by one.

**Term i:** This term could be easily bound by

$$\mathbb{E}[\eta_t \|g(y_{t+1})\|^2] \leq \frac{1}{q} \mathbb{E}[\|g(y_{t+1})\|^2] = \frac{1}{q} \mathbb{E}[\mathbb{E}[\|g(y_{t+1})\|^2 | \mathcal{Y}_{t+1}]] \leq \frac{G^2}{q} \quad (11)$$

**Term ii:** Note that  $\eta_t m_t = x_t - x_{t+1}$ , we have

$$\begin{aligned} \mathbb{E}[\langle g(y_{t+1}), \eta_t m_t \rangle | \mathcal{G}_t] &= \mathbb{E}[\mathbb{E}[\langle g(y_{t+1}), x_t - x_{t+1} \rangle | \mathcal{Y}_{t+1}] | \mathcal{G}_t] \\ &= \mathbb{E}[f'(y_{t+1}; x_t - x_{t+1}) | \mathcal{G}_t] \\ &= \int_{[0,1]} f'(x_{t+1} + \lambda(x_t - x_{t+1}); x_t - x_{t+1}) d\lambda \\ &= f(x_t) - f(x_{t+1}), \end{aligned}$$

where the second line we use the property of the oracle given in Assumption 1(b). Thus by taking the expectation, we have

$$\sum_{t=1}^T \mathbb{E}[\langle g(y_{t+1}), \eta_t m_t \rangle] = \mathbb{E}[f(x_1) - f(x_{T+1})] \leq \Delta$$

**Term iii:** we would like to develop a telescopic sum for the third term, however this is non-trivial since the stepsize  $\eta_t$  is adaptive. Extensive algebraic manipulation is involved.

$$\begin{aligned} & \sum_{t=1}^T \eta_t (-\|m_{t+1}\|^2 + \beta^2 \|m_t\|^2) \\ &= \sum_{t=1}^T \frac{-\|m_{t+1}\|^2}{p\|m_t\| + q} + \beta^2 \sum_{t=1}^T \frac{\|m_t\|^2}{p\|m_t\| + q} \\ &= \sum_{t=1}^T \left( \frac{-\|m_{t+1}\|^2}{p\|m_t\| + q} + \frac{\|m_{t+1}\|^2}{p\|m_{t+1}\| + q} \right) - \sum_{t=1}^T \frac{\|m_{t+1}\|^2}{p\|m_{t+1}\| + q} + \beta^2 \sum_{t=1}^T \frac{\|m_t\|^2}{p\|m_t\| + q} \\ &= \sum_{t=1}^T \frac{p\|m_{t+1}\|^2 (\|m_t\| - \|m_{t+1}\|)}{(p\|m_t\| + q)(p\|m_{t+1}\| + q)} + \beta^2 \frac{\|m_1\|^2}{p\|m_1\| + q} + (\beta^2 - 1) \sum_{t=2}^{T+1} \frac{\|m_t\|^2}{p\|m_t\| + q} \end{aligned} \quad (12)$$

The first equality follows by  $\eta_t = \frac{1}{p\|m_t\|+q}$ . The second equality subtract and add the same terms  $\frac{\|m_{t+1}\|^2}{p\|m_{t+1}\|+q}$ . The last equality regroups the terms.

We now prove the first term in (12) admits the following upper bound:

$$\frac{p\|m_{t+1}\|^2(\|m_t\| - \|m_{t+1}\|)}{(p\|m_t\| + q)(p\|m_{t+1}\| + q)} \leq (1 - \beta) \frac{\|m_{t+1}\|^2}{p\|m_{t+1}\| + q} + \frac{(1 - \beta)p\|g(y_{t+1})\|}{q} \frac{\|m_t\|^2}{p\|m_t\| + q} \quad (13)$$

Note that if  $\|m_{t+1}\| \geq \|m_t\|$  then the inequality trivially holds. Thus, we only need to consider the case when  $\|m_{t+1}\| \leq \|m_t\|$ . By triangle inequality,

$$\begin{aligned} \|m_t\| - \|m_{t+1}\| &\leq \|m_t - m_{t+1}\| = (1 - \beta)\|m_t - g(y_{t+1})\| \\ &\leq (1 - \beta)(\|m_t\| + \|g(y_{t+1})\|). \end{aligned}$$

Therefore, substitute the above inequality into lefthand side of (13) and regroup the fractions,

$$\begin{aligned} \frac{p\|m_{t+1}\|^2(\|m_t\| - \|m_{t+1}\|)}{(p\|m_t\| + q)(p\|m_{t+1}\| + q)} &\leq \frac{p\|m_{t+1}\|^2(1 - \beta)(\|m_t\| + \|g(y_{t+1})\|)}{(p\|m_t\| + q)(p\|m_{t+1}\| + q)} \\ &= (1 - \beta) \frac{\|m_{t+1}\|^2}{p\|m_{t+1}\| + q} \frac{p\|m_t\|}{p\|m_t\| + q} + \frac{(1 - \beta)p\|g(y_{t+1})\|}{p\|m_t\| + q} \frac{\|m_{t+1}\|^2}{p\|m_{t+1}\| + q} \\ &\leq (1 - \beta) \frac{\|m_{t+1}\|^2}{p\|m_{t+1}\| + q} + \frac{(1 - \beta)p\|g(y_{t+1})\|}{q} \frac{\|m_t\|^2}{p\|m_t\| + q}, \end{aligned}$$

where the last step we use the fact that  $\|m_{t+1}\| \leq \|m_t\|$  and the function  $x \rightarrow x^2/(px + q)$  is increasing on  $\mathbb{R}_+$ . Now, taking expectation on both sides of (13) yields

$$\begin{aligned} \mathbb{E} \left[ \frac{p\|m_{t+1}\|^2(\|m_t\| - \|m_{t+1}\|)}{(p\|m_t\| + q)(p\|m_{t+1}\| + q)} \right] &\leq (1 - \beta) \mathbb{E} \left[ \frac{\|m_{t+1}\|^2}{p\|m_{t+1}\| + q} \right] + \frac{p(1 - \beta)}{q} \mathbb{E} \left[ \|g(y_{t+1})\| \frac{\|m_t\|^2}{p\|m_t\| + q} \right] \\ &= (1 - \beta) \mathbb{E} \left[ \frac{\|m_{t+1}\|^2}{p\|m_{t+1}\| + q} \right] + \frac{p(1 - \beta)}{q} \mathbb{E} \left[ \mathbb{E} [\|g(y_{t+1})\| | \mathcal{G}_t] \frac{\|m_t\|^2}{p\|m_t\| + q} \right] \\ &\leq (1 - \beta) \mathbb{E} \left[ \frac{\|m_{t+1}\|^2}{p\|m_{t+1}\| + q} \right] + \frac{p(1 - \beta)G}{q} \mathbb{E} \left[ \frac{\|m_t\|^2}{p\|m_t\| + q} \right] \\ &\leq (1 - \beta) \mathbb{E} \left[ \frac{\|m_{t+1}\|^2}{p\|m_{t+1}\| + q} \right] + \frac{\beta(1 - \beta)}{2} \mathbb{E} \left[ \frac{\|m_t\|^2}{p\|m_t\| + q} \right] \end{aligned}$$

where the third inequality follows by the fact that  $\mathbb{E}[\|g(y_{t+1})\| | \mathcal{G}_t] \leq \sqrt{L^2 + \sigma^2}$  and the last inequality follows from our choice of parameters ensuring  $pG/q \leq \beta/2$ .

Now we are ready to proceed the telescopic summing. Summing up over  $t$  and yields

$$\begin{aligned} &\sum_{t=1}^T \mathbb{E} [\eta_t (-\|m_{t+1}\|^2 + \beta^2 \|m_t\|^2)] \\ &\leq (1 - \beta) \sum_{t=1}^T \mathbb{E} \left[ \frac{\|m_{t+1}\|^2}{p\|m_{t+1}\| + q} \right] + \frac{\beta - \beta^2}{2} \sum_{t=1}^T \mathbb{E} \left[ \frac{\|m_t\|^2}{p\|m_t\| + q} \right] + \beta^2 \mathbb{E} \left[ \frac{\|m_1\|^2}{p\|m_1\| + q} \right] + (\beta^2 - 1) \sum_{t=2}^{T+1} \mathbb{E} \left[ \frac{\|m_t\|^2}{p\|m_t\| + q} \right] \\ &= \frac{\beta^2 + \beta}{2} \mathbb{E} \left[ \frac{\|m_1\|^2}{p\|m_1\| + q} \right] + \frac{\beta^2 - \beta}{2} \sum_{t=2}^{T+1} \mathbb{E} \left[ \frac{\|m_t\|^2}{p\|m_t\| + q} \right] \\ &= \beta^2 \mathbb{E} \left[ \frac{\|m_1\|^2}{p\|m_1\| + q} \right] + \frac{\beta^2 - \beta}{2} \sum_{t=1}^{T+1} \mathbb{E} \left[ \frac{\|m_t\|^2}{p\|m_t\| + q} \right] \\ &\leq \frac{\beta^2 G^2}{q} + \frac{\beta^2 - \beta}{2} \sum_{t=1}^{T+1} \mathbb{E} \left[ \frac{\|m_t\|^2}{p\|m_t\| + q} \right] \end{aligned}$$

The first inequality uses (13). The third line and the fourth line regroup the terms. The last line follows by  $p\|m_1\| + q \geq q$  and  $\mathbb{E}[\|m_1\|^2] \leq G^2$ .

Combine all term i, ii and iii in (10) yields

$$\frac{\beta - \beta^2}{2} \sum_{t=1}^{T+1} \mathbb{E} \left[ \frac{\|m_t\|^2}{p\|m_t\| + q} \right] \leq 2\beta(1 - \beta)\mathbb{E}[f(x_1) - f(x_{T+1})] + \frac{\beta^2 G^2}{q} + T(1 - \beta)^2 \frac{G^2}{q}.$$

Multiply both side by  $\frac{2q}{T(\beta - \beta^2)}$  we get

$$\frac{1}{T} \sum_{t=1}^T \mathbb{E} \left[ \frac{q\|m_t\|^2}{p\|m_t\| + q} \right] \leq \frac{4q\Delta}{T} + \frac{2\beta G^2}{T(1 - \beta)} + \frac{2(1 - \beta)G^2}{\beta} \quad (14)$$

We may assume  $\epsilon \leq G$ , otherwise any  $x_t$  is a  $(\delta, \epsilon)$ -stationary point. Then by choosing  $\beta = 1 - \frac{\epsilon^2}{64G^2}$ ,  $p = \frac{64G^2 \ln(16G/\epsilon)}{\delta\epsilon^2}$ ,  $q = \frac{256G^3 \ln(16G/\epsilon)}{\delta\epsilon^2}$ ,  $T = \frac{2^{16} G^3 \Delta \ln(16G/\epsilon)}{\epsilon^4 \delta} \max\{1, \frac{G\delta}{8\Delta}\}$ , have

$$\frac{1}{T} \sum_{t=1}^T \mathbb{E} \left[ \frac{4G\|m_t\|^2}{\|m_t\| + 4G} \right] \leq \frac{\epsilon^2}{17} \quad (15)$$

Note that the function  $x \rightarrow x^2/(x + 4G)$  is convex, thus by Jensen's inequality, for any  $t$ , we have

$$\frac{4G\mathbb{E}[\|m_t\|^2]}{\mathbb{E}[\|m_t\|] + 4G} \leq \mathbb{E} \left[ \frac{4G\|m_t\|^2}{\|m_t\| + 4G} \right] \quad (16)$$

Let's denote

$$m_{avg} = \frac{1}{T} \sum_{t=1}^T \mathbb{E}[\|m_t\|],$$

then again by Jensen's inequality,

$$\frac{4Gm_{avg}^2}{m_{avg} + 4G} \leq \frac{1}{T} \sum_{t=1}^T \frac{4G\mathbb{E}[\|m_t\|^2]}{\mathbb{E}[\|m_t\|] + 4G} \leq \frac{\epsilon^2}{17}$$

Solving the quadratic inequality with respect to  $m_{avg}$  and using  $\epsilon \leq G$ , we have

$$\frac{1}{T} \sum_{t=1}^T \mathbb{E}[\|m_t\|] \leq \frac{\epsilon}{4}.$$

In contrast to the smooth case, we cannot directly conclude from this inequality since  $m_t$  is not the gradient at  $x_t$ . Indeed, it is the convex combination of all previous stochastic gradients. Therefore, we still need to find a reference point such that  $m_t$  is approximately in the  $\delta$ -subdifferential of the reference point. Note that

$$m_t = \sum_{i=t-K+1}^t \alpha_i g(y_i) + \beta^K m_{t-K}$$

Intuitively, when  $K$  is sufficiently large, the contribution of the last term in  $m_t$  is negligible. In which case, we could deduce  $m_t$  is approximately in  $\partial f(x_{t-K} + \delta B)$ . More precisely, with  $\beta = 1 - \frac{\epsilon^2}{64G^2}$ , as long as  $K \geq \frac{64G^2}{\epsilon^2} \ln(\frac{16G}{\epsilon})$ , we have

$$\beta^K \leq \frac{\epsilon}{16G}.$$

This is a simple analysis result using the fact that  $\ln(1 - x) \leq -x$ . Then by Assumption on the oracle, we know that  $\mathbb{E}[g(y_i)|\mathcal{Y}_i] \in \partial f(y_i)$  and  $\|y_i - x_{t-K}\| \leq \frac{K}{p} \leq \delta$  for any  $i \in [t - K + 1, t]$ . Thus,

$$\mathbb{E}[g(y_i)|x_{t-K}] \in \partial f(x_{t-K} + \delta B).$$

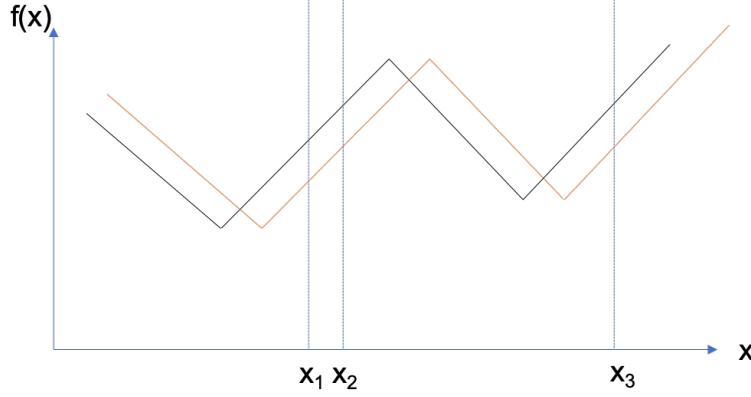

Figure 2.

Consequently, the convex combination

$$\sum \alpha_i \sum_{i=t-K+1}^t \alpha_i \mathbb{E}[g(y_i)|x_{t-K}] \in \partial f(x_{t-K} + \delta B).$$

Note that  $\sum \alpha_i = 1 - \beta^K$ , the above inclusion could be rewritten as

$$\frac{1}{1 - \beta^K} (\mathbb{E}[m_t|x_{t-K}] - \beta^K m_{t-K}) \in \partial f(x_{t-K} + \delta B).$$

This implies that conditioned on  $x_{t-K}$

$$d(0, \partial f(x_{t-K} + \delta B)) \leq \frac{1}{1 - \beta^K} (\|\mathbb{E}[m_t | x_{t-K}]\| + \beta^K \|m_{t-K}\|) \leq \frac{1}{1 - \beta^K} (\mathbb{E}[\|m_t\| | x_{t-K}] + \beta^K \|m_{t-K}\|).$$

Therefore, by taking the expectation,

$$\mathbb{E}[d(0, \partial f(x_{t-K} + \delta B))] \leq \frac{1}{1 - \beta^K} (\mathbb{E}[\|m_t\|] + \beta^K G) \leq \frac{1}{1 - \frac{1}{16}} (\mathbb{E}[\|m_t\|] + \frac{\epsilon}{16}) = \frac{16}{15} \mathbb{E}[\|m_t\|] + \frac{\epsilon}{15}.$$

Finally, averaging over  $t = 1$  to  $T$  yields,

$$\frac{1}{T} \sum_{t=1}^T \mathbb{E}[d(0, \partial f(x_{t-K} + \delta B))] \leq \frac{16}{15T} \sum_{t=1}^T \mathbb{E}[\|m_t\|] + \frac{\epsilon}{15} \leq \frac{\epsilon}{3}$$

When  $t < K$ ,  $\partial f(x_{t-K} + \delta B)$  simply means  $\partial f(x_1 + \delta B)$ . As a result, if we randomly out put  $x_{\max\{1, t-K\}}$  among  $t \in [1, T]$ , then with at least probability  $2/3$ , the  $\delta$ -subdifferential set contains an element with norm smaller than  $\epsilon$ . To achieve  $1 - \gamma$  probability result for arbitrary  $\gamma$ , it suffices to repeat the algorithm  $\log(1/\gamma)$  times. □

## E. Proof of Theorem 11

*Proof.* The proof idea is similar to Proof of Theorem 5. Since the algorithm does not have access to function value, our resisting strategy now always returns

$$\nabla f(x) = 1.$$

If we can prove that for any set of points  $x_k, k \in [1, K], K \leq \frac{\Delta}{8\delta}$ , there exists two one dimensional functions such that they satisfy the resisting strategy  $\nabla f(x_k) = 1, k \in [1, K]$ , and that the two functions do not have two stationary points that are



$\delta$  close to each other, then we know no randomized/deterministic can return an  $(\delta, \epsilon)$ -stationary points with probability more than  $1/2$  for both functions simultaneously. In other word, no algorithm that query  $K$  points can distinguish these two functions. Hence we proved the theorem following the definition of complexity in (5).

From now on, let  $x_k, k \in [1, K]$  be the sequence of points queried after sorting in ascending order. Below, we construct two functions such that  $\nabla f(x_k) = 1, k \in [1, K]$ , and that the two functions do not have two stationary points that are  $\delta$  close to each other. Assume WLOG that  $x_k$  are ascending. First, we define  $f : \mathbb{R} \rightarrow \mathbb{R}$  as follows:

$$\begin{aligned} f(x_0) &= 0, \\ f'(x) &= -1 \quad \text{if } x \leq x_1 - 2\delta, \\ f'(x) &= 1 \quad \text{if exists } i \in [K] \text{ such that } |x - x_i| \leq 2\delta, \\ f'(x) &= -1 \quad \text{if exists } i \in [K] \text{ such that } x \in [x_i + 2\delta, \frac{x_i + x_{i+1}}{2}], \\ f'(x) &= 1 \quad \text{if exists } i \in [K] \text{ such that } x \in [\frac{x_i + x_{i+1}}{2}, x_{i+1} - 2\delta], \\ f'(x) &= 1 \quad \text{if } x \geq x_K + 2\delta \end{aligned}$$

A schematic picture is shown in Figure 2. It is clear that this function satisfies the resisting strategy. It also has stationary points that are at least  $4\delta$  apart. Therefore, simply by shifting the function by  $1.5\delta$ , we get the second function.

The only thing left to check is that  $\sup_k f(x_k) - \inf_x f(x) \leq \Delta$ . By construction, we note that the value from  $x_i$  to  $x_{i+1}$  is non decreasing and increase by at most  $4\delta$

$$\sup_k f(x_k) - f(x_0) \leq 4\delta K \leq \Delta/2. \tag{17}$$

We further notice that the global minimum of the function is achieved at  $x_0 - 2\delta$ , and  $f(x_0 - 2\delta) = -2\delta \leq 4\delta K \leq \Delta/2$ . Combined with (17), we get,

$$\sup_k f(x_k) - \inf_x f(x) \leq \Delta. \tag{18}$$

□
